# Supplementary material for: Preparation and characterization of [CF3SO3(SiMe3)2]+[B(C6F5)4]−
Source: Royal Society of Chemistry journal article supplement (doi:10.1039/c0cc00013b), 2010-01-01
Supplement: c0cc00013b.pdf [file c0cc00013b.pdf]

## SUPPORTING INFORMATION

### Preparation and Characterization of $[\text{CF}_3\text{SO}_3(\text{SiMe}_3)_2]^+ [\text{B}(\text{C}_6\text{F}_5)_4]^-$

*Axel Schulz\* and Alexander Villinger\**

#### **This file includes:**

|                                                                      |       |
|----------------------------------------------------------------------|-------|
| 1. Experimental                                                      | p. 2  |
| 2. Structure Elucidation                                             | p. 3  |
| 3. Synthesis of bis(trimethylsilyl)trifluoromethylsulfonium cation   | p. 9  |
| 4. Synthesis of diethyl(trimethylsilyl)oxonium cation                | p. 10 |
| 5. IR, Raman and NMR-data of trifluoromethylsulfonatotrimethylsilane | p. 11 |
| 6. Computational Details                                             | p. 11 |
| 7. References                                                        | p. 12 |

## 1. Experimental

**General Information.** All manipulations were carried out under oxygen- and moisture-free conditions under argon using standard Schlenk or drybox techniques.

Trifluoromethylsulfonatotrimethylsilane  $\text{Me}_3\text{Si}-\text{CF}_3\text{SO}_3$  (99%, Sigma-Aldrich) was recondensed prior to use. Benzene and diethyl ether were dried over Na/benzophenone and freshly distilled prior to use. Trimethylsilylenium tetrakis(pentafluorophenyl)borate  $[\text{Me}_3\text{Si}][\text{B}(\text{C}_6\text{F}_5)_4]$  was prepared as previously reported.<sup>[1]</sup> Diethyl(trimethylsilyl)oxonium tetrakis(pentafluorophenyl)borate  $[\text{Et}_2\text{OSiMe}_3][\text{B}(\text{C}_6\text{F}_5)_4]$  (**2**) has been reported previously, but was prepared according to a modified procedure.<sup>[2]</sup>

**NMR:**  $^{29}\text{Si}$  INEPT,  $^{19}\text{F}\{\text{H}\}$ ,  $^{13}\text{C}\{\text{H}\}$ ,  $^{13}\text{C}$  DEPT,  $^{11}\text{B}\{\text{H}\}$ , and  $^1\text{H}$  NMR spectra were obtained on a Bruker AVANCE 250, or 300 spectrometer and were referenced internally to the deuterated solvent ( $^{13}\text{C}$ ,  $\text{C}_6\text{D}_6$ :  $\delta_{\text{reference}} = 128$  ppm) or to protic impurities in the deuterated solvent ( $^1\text{H}$ ,  $\text{C}_6\text{D}_5\text{H}$ :  $\delta_{\text{reference}} = 7.16$  ppm). Measurement in neat trifluoromethylsulfonatotrimethylsilane was performed with  $\text{C}_6\text{D}_6$  as external reference (denoted as  $\text{C}_6\text{D}_{6(\text{ext.})}$ ;  $\delta_{\text{reference}}$  see above), which was added in a sealed glass capillary.  $\text{C}_6\text{D}_6$  was dried over Na/benzophenone and freshly distilled prior to use.

**IR:** Nicolet 6700 FT-IR spectrometer with a Smart Endurance ATR device was used.

**Raman:** Bruker VERTEX 70 FT-IR with RAM II FT-Raman module, equipped with a Nd:YAG laser (1064 nm) was used.

**CHN analyses:** Analysator Flash EA 1112 from Thermo Quest was used.  $\text{V}_2\text{O}_5$  was added.

**Melting points** are uncorrected (EZ-Melt, Stanford Research Systems). Heating-rate 20 °C/min (clearing-points are reported).

## 2. Structure elucidation

**X-ray Structure Determination:** X-ray quality crystals of  $[(\text{SiMe}_3)_2\text{CF}_3\text{SO}_3][\text{B}(\text{C}_6\text{F}_5)_4]$  (**1**) and diethyl(trimethylsilyl)oxonium tetrakis(pentafluorophenyl)borate  $[\text{Et}_2\text{OSiMe}_3][\text{B}(\text{C}_6\text{F}_5)_4]$  (**2**) were selected in Fomblin YR-1800 perfluoroether (Alfa Aesar) at ambient temperatures. The samples were cooled to 173(2) K during measurement. The data was collected on a Bruker Apex Kappa-II CCD diffractometer using graphite monochromated Mo-K $\alpha$  radiation ( $\lambda = 0.71073$ ). The structures were solved by direct methods (*SHELXS-97*)<sup>[3]</sup> and refined by full-matrix least squares procedures (*SHELXL-97*).<sup>[4]</sup> Semi-empirical absorption corrections were applied (*SADABS*).<sup>[5]</sup> All non hydrogen atoms were refined anisotropically, hydrogen atoms were included in the refinement at calculated positions using a riding model. The structure of **2** is known in literature.<sup>[2]</sup>

**Table S1.** Crystallographic Details of **1** and **2**.

|                                                                                           | <b>1</b>                                                                         | <b>2</b>                                              |
|-------------------------------------------------------------------------------------------|----------------------------------------------------------------------------------|-------------------------------------------------------|
| Chem. Formula                                                                             | C <sub>31</sub> H <sub>18</sub> BF <sub>23</sub> O <sub>3</sub> SSi <sub>2</sub> | C <sub>34</sub> H <sub>22</sub> BF <sub>20</sub> O Si |
| Form. Wght. [g mol <sup>-1</sup> ]                                                        | 974.50                                                                           | 865.42                                                |
| Colour                                                                                    | Colourless                                                                       | Colourless                                            |
| Cryst. system                                                                             | Triclinic                                                                        | Monoclinic                                            |
| Space group                                                                               | <i>P</i> -1                                                                      | <i>P</i> 2 <sub>1</sub> / <i>c</i>                    |
| <i>a</i> [Å]                                                                              | 10.319(6)                                                                        | 10.0769(4)                                            |
| <i>b</i> [Å]                                                                              | 13.300(7)                                                                        | 21.4560(8)                                            |
| <i>c</i> [Å]                                                                              | 15.086(9)                                                                        | 16.9696(6)                                            |
| $\alpha$ [°]                                                                              | 68.287(10)                                                                       | 90.00                                                 |
| $\beta$ [°]                                                                               | 82.484(12)                                                                       | 105.6467(19)                                          |
| $\gamma$ [°]                                                                              | 76.86(2)                                                                         | 90.00                                                 |
| <i>V</i> [Å <sup>3</sup> ]                                                                | 1870.7(19)                                                                       | 3533.0(2)                                             |
| <i>Z</i>                                                                                  | 2                                                                                | 4                                                     |
| $\rho_{\text{calc.}}$ [g cm <sup>-3</sup> ]                                               | 1.730                                                                            | 1.627                                                 |
| $\mu$ [mm <sup>-1</sup> ]                                                                 | 0.300                                                                            | 0.202                                                 |
| $\lambda_{\text{MoK}\alpha}$ [Å]                                                          | 0.71073                                                                          | 0.71073                                               |
| <i>T</i> [K]                                                                              | 173(2)                                                                           | 173(2)                                                |
| Measured reflections                                                                      | 38916                                                                            | 34014                                                 |
| Independent reflections                                                                   | 10715                                                                            | 8099                                                  |
| Reflections with <i>I</i> > 2 $\sigma$ ( <i>I</i> )                                       | 8535                                                                             | 5515                                                  |
| R <sub>int.</sub>                                                                         | 0.0259                                                                           | 0.0404                                                |
| <i>F</i> (000)                                                                            | 968                                                                              | 1732                                                  |
| <i>R</i> <sub>1</sub> (R [ <i>F</i> <sup>2</sup> > 2 $\sigma$ ( <i>F</i> <sup>2</sup> )]) | 0.0360                                                                           | 0.0460                                                |
| w <i>R</i> <sub>2</sub> (all data, <i>F</i> <sup>2</sup> )                                | 0.1035                                                                           | 0.1332                                                |
| GooF                                                                                      | 1.053                                                                            | 1.060                                                 |
| Parameters                                                                                | 556                                                                              | 534                                                   |
| CCDC #                                                                                    | 766935                                                                           | 770479                                                |

**Scheme S1.** Numbering scheme of **1**.

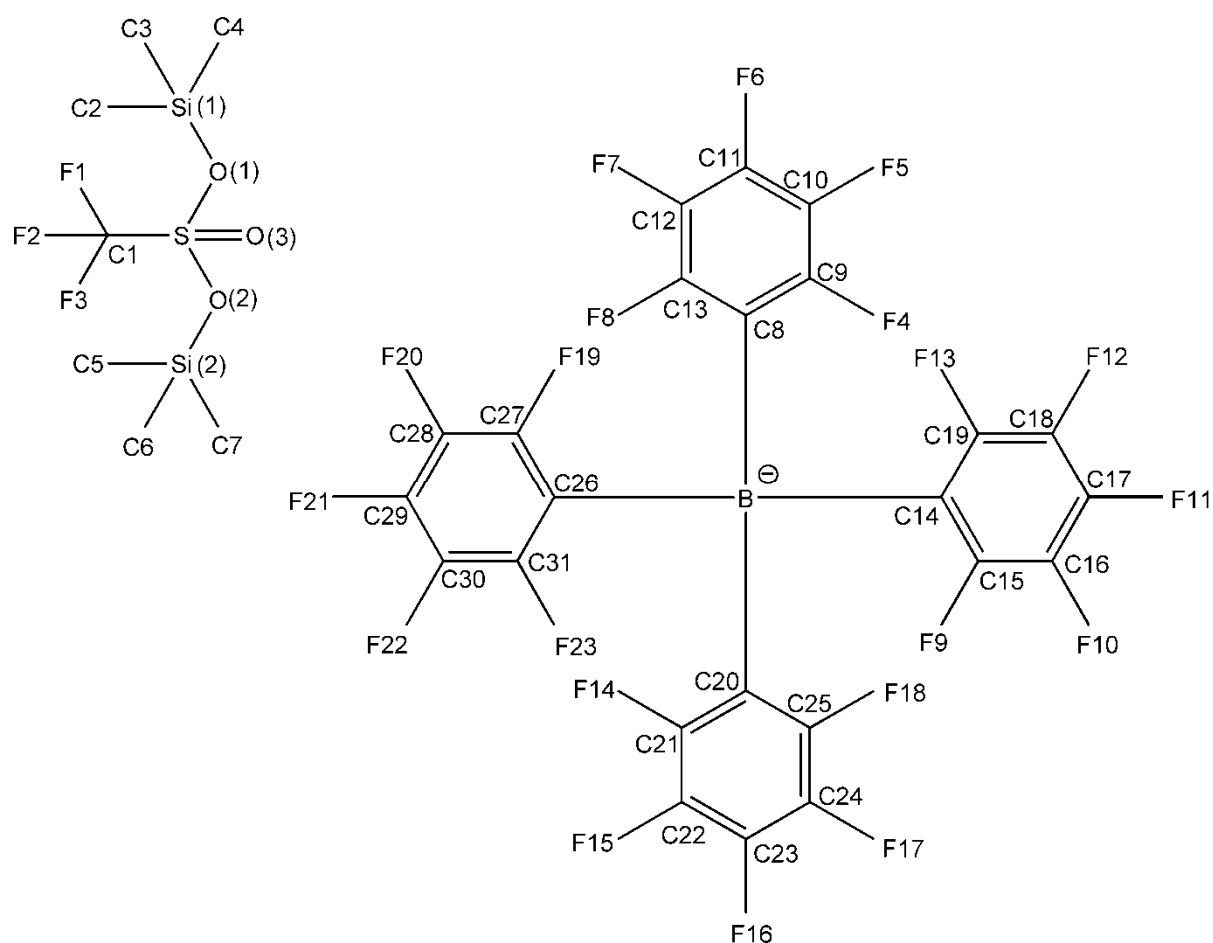

**Table S2.** Selected bond lengths (Å), angles and torsion angles (°) of **1**.

|               |             |                  |             |
|---------------|-------------|------------------|-------------|
| <b>S—O3</b>   | 1.4109 (13) | <b>C5—Si2—C7</b> | 114.32 (12) |
| <b>S—O1</b>   | 1.4769 (12) | <b>O2—Si2—C7</b> | 104.26 (11) |
| <b>S—O2</b>   | 1.4774 (13) | <b>S—O1—Si1</b>  | 132.16 (7)  |
| <b>S—C1</b>   | 1.830 (2)   | <b>S—O2—Si2</b>  | 135.01 (8)  |
| <b>Si1—O1</b> | 1.8131 (15) | <b>F2—C1—F1</b>  | 110.10 (18) |
| <b>Si1—C3</b> | 1.8249 (17) | <b>F2—C1—F3</b>  | 111.15 (17) |
| <b>Si1—C4</b> | 1.833 (2)   | <b>F1—C1—F3</b>  | 109.74 (15) |
| <b>Si1—C2</b> | 1.835 (2)   | <b>F2—C1—S</b>   | 110.41 (13) |
| <b>Si2—C6</b> | 1.818 (2)   | <b>F1—C1—S</b>   | 108.30 (14) |
| <b>Si2—C5</b> | 1.8204 (18) | <b>F3—C1—S</b>   | 107.06 (15) |

|                  |             |                    |              |
|------------------|-------------|--------------------|--------------|
| <b>Si2—O2</b>    | 1.8240 (14) | <b>O3—S—O1—Si1</b> | 3.63 (14)    |
| <b>Si2—C7</b>    | 1.834 (3)   | <b>O2—S—O1—Si1</b> | -128.98 (11) |
| <b>F1—C1</b>     | 1.311 (2)   | <b>C1—S—O1—Si1</b> | 123.41 (11)  |
| <b>F2—C1</b>     | 1.298 (2)   | <b>C3—Si1—O1—S</b> | -176.83 (10) |
| <b>F3—C1</b>     | 1.313 (2)   | <b>C4—Si1—O1—S</b> | 63.76 (13)   |
| <b>O3—S—O1</b>   | 116.77 (8)  | <b>C2—Si1—O1—S</b> | -57.13 (13)  |
| <b>O3—S—O2</b>   | 116.76 (8)  | <b>O3—S—O2—Si2</b> | 6.19 (15)    |
| <b>O1—S—O2</b>   | 106.64 (8)  | <b>O1—S—O2—Si2</b> | 138.81 (11)  |
| <b>O3—S—C1</b>   | 109.95 (9)  | <b>C1—S—O2—Si2</b> | -114.36 (13) |
| <b>O1—S—C1</b>   | 101.89 (8)  | <b>C6—Si2—O2—S</b> | 48.10 (16)   |
| <b>O2—S—C1</b>   | 102.98 (9)  | <b>C5—Si2—O2—S</b> | 169.29 (13)  |
| <b>O1—Si1—C3</b> | 99.67 (6)   | <b>C7—Si2—O2—S</b> | -73.03 (15)  |
| <b>O1—Si1—C4</b> | 102.33 (7)  | <b>O3—S—C1—F2</b>  | -177.53 (14) |
| <b>C3—Si1—C4</b> | 115.91 (9)  | <b>O1—S—C1—F2</b>  | 57.99 (16)   |
| <b>O1—Si1—C2</b> | 104.08 (7)  | <b>O2—S—C1—F2</b>  | -52.42 (16)  |
| <b>C3—Si1—C2</b> | 115.65 (9)  | <b>O3—S—C1—F1</b>  | 61.86 (13)   |
| <b>C4—Si1—C2</b> | 115.76 (10) | <b>O1—S—C1—F1</b>  | -62.61 (13)  |
| <b>C6—Si2—C5</b> | 117.16 (11) | <b>O2—S—C1—F1</b>  | -173.02 (11) |
| <b>C6—Si2—O2</b> | 105.66 (8)  | <b>O3—S—C1—F3</b>  | -56.41 (15)  |
| <b>C5—Si2—O2</b> | 97.95 (8)   | <b>O1—S—C1—F3</b>  | 179.12 (12)  |
| <b>C6—Si2—C7</b> | 114.58 (13) | <b>O2—S—C1—F3</b>  | 68.71 (14)   |

**Scheme S2.** Numbering scheme of **2**.

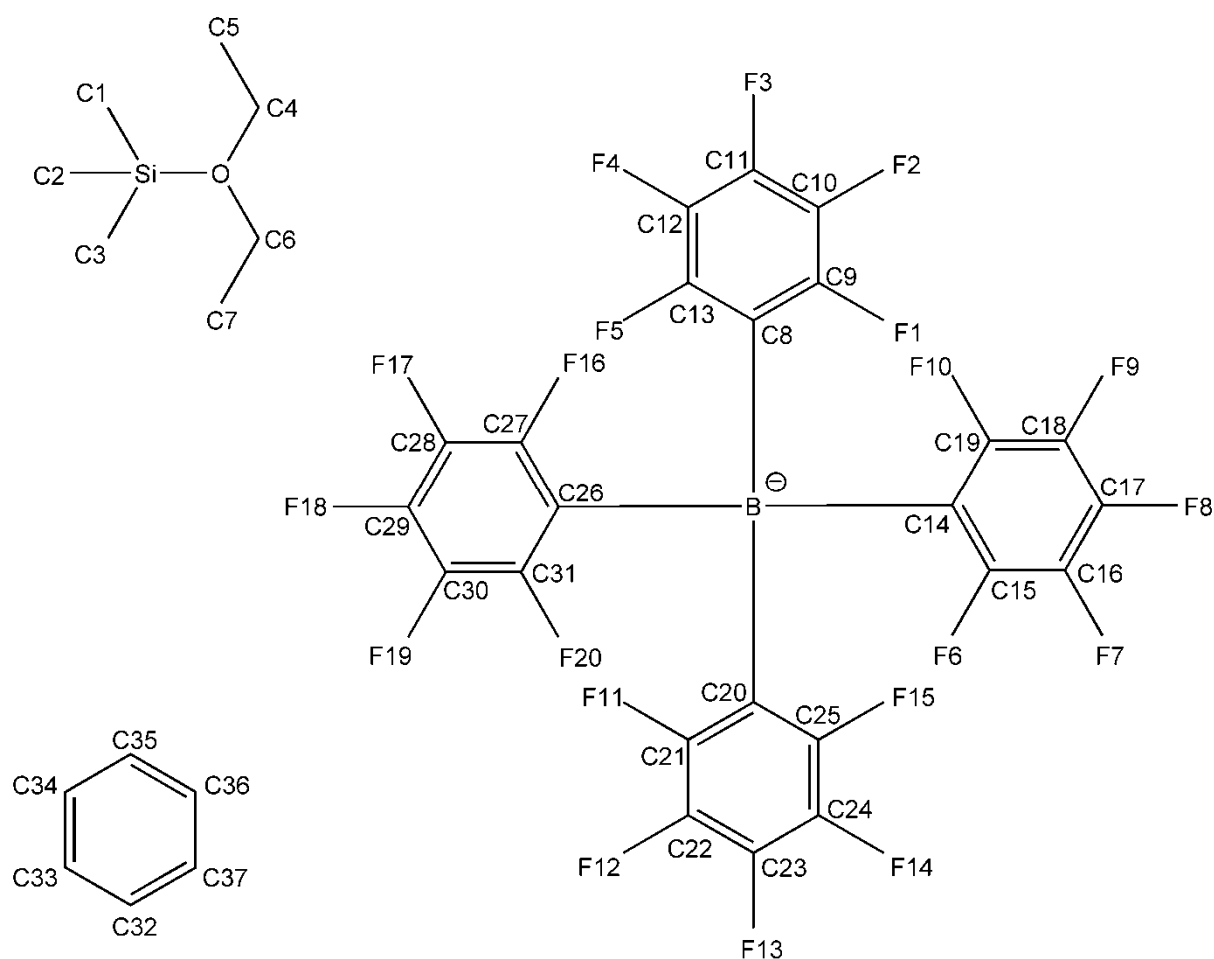

**Table S3.** Selected bond lengths (Å), angles and torsion angles (°) of **2**.

|                |             |                   |              |
|----------------|-------------|-------------------|--------------|
| <b>Si—O</b>    | 1.7906 (16) | <b>C6—O—Si</b>    | 120.97 (14)  |
| <b>Si—C1</b>   | 1.826 (2)   | <b>C4—O—Si</b>    | 123.49 (14)  |
| <b>Si—C2</b>   | 1.834 (3)   | <b>C5—C4—O</b>    | 111.0 (2)    |
| <b>Si—C3</b>   | 1.842 (3)   | <b>O—C6—C7</b>    | 110.7 (2)    |
| <b>O—C6</b>    | 1.475 (3)   | <b>C1—Si—O—C6</b> | 169.65 (17)  |
| <b>O—C4</b>    | 1.492 (3)   | <b>C2—Si—O—C6</b> | 51.55 (19)   |
| <b>C4—C5</b>   | 1.485 (4)   | <b>C3—Si—O—C6</b> | -69.97 (19)  |
| <b>C6—C7</b>   | 1.491 (4)   | <b>C1—Si—O—C4</b> | -25.6 (2)    |
| <b>O—Si—C1</b> | 104.37 (9)  | <b>C2—Si—O—C4</b> | -143.73 (19) |
| <b>O—Si—C2</b> | 104.15 (11) | <b>C3—Si—O—C4</b> | 94.76 (19)   |

|                 |             |                   |             |
|-----------------|-------------|-------------------|-------------|
| <b>C1—Si—C2</b> | 112.45 (13) | <b>C6—O—C4—C5</b> | 86.5 (3)    |
| <b>O—Si—C3</b>  | 105.91 (11) | <b>Si—O—C4—C5</b> | -79.2 (2)   |
| <b>C1—Si—C3</b> | 113.77 (13) | <b>C4—O—C6—C7</b> | 82.8 (3)    |
| <b>C2—Si—C3</b> | 114.87 (14) | <b>C1—Si—O—C6</b> | 169.65 (17) |
| <b>C6—O—C4</b>  | 113.94 (17) |                   |             |



### 3. Synthesis of bis(trimethylsilyl)trifluoromethylsulfonium tetrakis pentafluorophenyl-borate $[(\text{SiMe}_3)_2\text{CF}_3\text{SO}_3][\text{B}(\text{C}_6\text{F}_5)_4]$

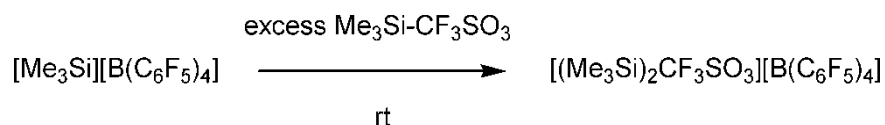

To neat trimethylsilylenium tetrakis(pentafluorophenyl)borate  $[\text{Me}_3\text{Si}][\text{B}(\text{C}_6\text{F}_5)_4]$  (0.752 g, 1.0 mmol), a minimum of trifluoromethylsulfonato trimethylsilane (10 to 20 fold molar excess) was added dropwise at ambient temperatures with stirring, followed by gently heating to 60 °C. The resulting clear colourless solution was concentrated to incipient crystallisation. Storage at 5 °C for ten hours resulted in the deposition of colourless crystals. Removal of the supernatant by decantation, washing with 2 mL of neat trifluoromethylsulfonate and drying *in vacuo* yielded 0.811 g (0.832 mmol, 83%) bis(trimethylsilyl)trifluoromethylsulfonium tetrakis pentafluorophenylborate  $[(\text{SiMe}_3)_2\text{CF}_3\text{SO}_3][\text{B}(\text{C}_6\text{F}_5)_4]$  (**1**) as colourless crystals.

Crystals suitable for X-ray crystallographic analysis were obtained directly from the above reaction solution.

#### $[(\text{Me}_3\text{Si})_2\text{CF}_3\text{SO}_3][\text{B}(\text{C}_6\text{F}_5)_4]$ (**1**)

Mp 127 °C (dec.). Anal. calc. % (found): C, 38.21 (40.71); H, 1.86 (1.80);  $^1\text{H}$  NMR (25 °C,  $\text{C}_6\text{D}_6$ , 250.13 MHz):  $\delta = -0.06$  (s, 18H,  $[\text{((CH}_3)_3\text{Si)}_2\text{CF}_3\text{SO}_3]^+$ ).  $^{11}\text{B}$  NMR (25 °C,  $\text{C}_6\text{D}_6$ , 96.3 MHz):  $\delta = -15.9$ .  $^{13}\text{C}\{^1\text{H}\}$  NMR (25 °C,  $\text{C}_6\text{D}_6$ , 75.5 MHz):  $\delta = -0.92$  (s,  $[\text{((CH}_3)_3\text{Si)}_2\text{CF}_3\text{SO}_3]^+$ ), 117.7 (q,  $[\text{((CH}_3)_3\text{Si)}_2\text{CF}_3\text{SO}_3]^+$ ,  $^1J(^{13}\text{C}-^{19}\text{F}) = 321$  Hz), 125 (br, *ipso-C*), 136.9 (dm, *m-CF*,  $^1J(^{13}\text{C}-^{19}\text{F}) = 246$  Hz), 138.8 (dm, *p-CF*,  $^1J(^{13}\text{C}-^{19}\text{F}) = 246$  Hz), 149.0 (dm, *o-CF*,  $^1J(^{13}\text{C}-^{19}\text{F}) = 242$  Hz).  $^{19}\text{F}\{^1\text{H}\}$  NMR (25 °C,  $\text{C}_6\text{D}_6$ , 282.4 MHz):  $\delta = -167.1$  (m, 8F, *m-CF*), -163.2 (m, 4F, *p-CF*), -132.1 (m, 8F, *o-CF*), -74.1 (s, 3F,  $[\text{((CH}_3)_3\text{Si)}_2\text{CF}_3\text{SO}_3]^+$ ).  $^{29}\text{Si}\{^1\text{H}\}$  NMR (25 °C,  $\text{C}_6\text{D}_6$ , 59.6 MHz):  $\delta = -75.4$  (s,  $[\text{((CH}_3)_3\text{Si)}_2\text{CF}_3\text{SO}_3]^+$ ).  $^1\text{H}$  NMR (25 °C,  $\text{C}_6\text{D}_6(\text{ext.})$ , 250.13 MHz):  $\delta = 0.77$  (s,  $(\text{CH}_3)_3\text{Si}-\text{CF}_3\text{SO}_3$ ),  $^1J(^1\text{H}-^{13}\text{C}) = 121.3$  Hz).  $^{13}\text{C}\{^1\text{H}\}$  NMR (25 °C,  $\text{C}_6\text{D}_6(\text{ext.})$ , 62.9 MHz):  $\delta = -0.49$  (s,  $(\text{CH}_3)_3\text{Si}-\text{CF}_3\text{SO}_3$ ,  $^1J(^{13}\text{C}-^{29}\text{Si}) = 60.2$  Hz), 119.0 (s,  $(\text{CH}_3)_3\text{Si}-\text{CF}_3\text{SO}_3$ ,  $^1J(^{13}\text{C}-^{19}\text{F}) = 317$  Hz).  $^{11}\text{B}$  NMR (25 °C,  $\text{C}_6\text{D}_6(\text{ext.})$ , 80.3 MHz):  $\delta = -16.2$ .  $^{29}\text{Si}\{^1\text{H}\}$  NMR (25 °C,  $\text{C}_6\text{D}_6(\text{ext.})$ , 49.7 MHz):  $\delta = 45.2$  ( $(\text{CH}_3)_3\text{Si}-\text{CF}_3\text{SO}_3$ ).  $^{19}\text{F}\{^1\text{H}\}$  NMR (25 °C,  $\text{C}_6\text{D}_6(\text{ext.})$ , 282.4 MHz):  $\delta = -167.9$  (m, 8F, *m-CF*), -164.4 (m,

4F, *p*-CF), -132.2 (m, 8F, *o*-CF), -78.0 ((CH<sub>3</sub>)<sub>3</sub>Si-CF<sub>3</sub>SO<sub>3</sub>). IR (ATR, 16 scans): 2979 (w), 2917 (w), 1644 (m), 1513 (s), 1460 (s), 1413 (m), 1383 (m), 1373 (m), 1367 (m), 1354 (m), 1268 (m), 1245 (s), 1200 (m), 1115 (m), 1107 (m), 1085 (s), 1008 (m), 974 (s), 912 (w), 907 (w), 867 (s), 834 (m), 814 (s), 773 (s), 770 (s), 756 (s), 727 (w), 684 (m), 662 (s), 623 (s), 612 (m), 604 (m), 574 (m), 542 (m). Raman (300 mW, 25 °C, 10000 scans, cm<sup>-1</sup>, rel. intensity > 1): = 2984 (5), 2917 (10), 2754 (3), 1647 (5), 1430 (2), 1389 (3), 1375 (3), 1300 (2), 1285 (2), 1096 (2), 1084 (2), 1072 (2), 1013 (2), 987 (2), 924 (2), 878 (2), 822 (4), 784 (3), 726 (2), 647 (2), 621 (5), 585 (8), 492 (6), 476 (6), 450 (7), 422 (6), 396 (6), 343 (2), 300 (2), 245 (4), 184 (3), 160 (4).

#### 4. Synthesis of diethyl(trimethylsilyl)oxonium tetrakis pentafluorophenylborate [Et<sub>2</sub>OSiMe<sub>3</sub>][B(C<sub>6</sub>F<sub>5</sub>)<sub>4</sub>] (2)

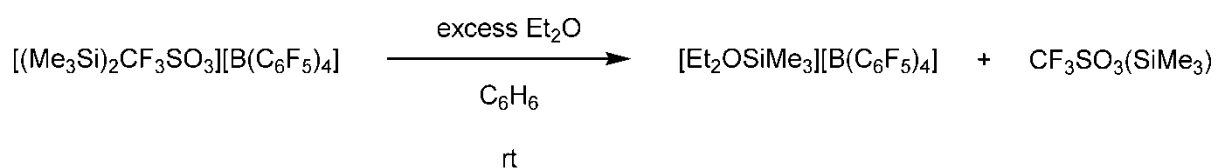

To a stirred suspension of bis(trimethylsilyl)trifluoromethylsulfonium tetrakis pentafluorophenylborate [(SiMe<sub>3</sub>)<sub>2</sub>CF<sub>3</sub>SO<sub>3</sub>][B(C<sub>6</sub>F<sub>5</sub>)<sub>4</sub>] (1) (0.487g, 0.5mmol) in benzene (30mL), diethylether (1mL) was added dropwise at ambient temperature. The resulting clear colourless solution (two layers) was concentrated to incipient crystallisation. Storage at 5 °C for ten hours resulted in the deposition of colourless crystals. Removal of the supernatant by decantation, washing with benzene (1mL) and drying *in vacuo* yielded 0.382g (0.46mmol, 92%) diethyl(trimethylsilyl)oxonium tetrakis(pentafluorophenyl)borate [Et<sub>2</sub>OSiMe<sub>3</sub>][B(C<sub>6</sub>F<sub>5</sub>)<sub>4</sub>] (2) as a colourless solid. Mp 152 °C (dec., ca. 87°C loss of C<sub>6</sub>H<sub>6</sub>). IR (ATR, 16 scans): 2997 (w), 2914 (w), 1644 (m), 1512 (s), 1455 (s), 1382 (m), 1326 (w), 1269 (m), 1190 (w), 1147 (w), 1082 (s), 1029 (w), 970 (s), 906 (w), 883 (m), 865 (m), 846 (m), 826 (m), 796 (w), 769 (m), 755 (s), 683 (m), 660 (s), 644 (w), 611 (m), 602 (m), 573 (m), 550 (w). Crystals suitable for X-ray crystallographic analysis were obtained directly from the above reaction solution.

## 5. IR, Raman and NMR data of trifluoromethylsulfonato trimethylsilane $\text{Me}_3\text{Si}-\text{CF}_3\text{SO}_3$

$^1\text{H}$  NMR (25 °C,  $\text{C}_6\text{D}_6$ , 300.13 MHz):  $\delta = -0.07$  (s, 9H,  $^1J(^1\text{H}-^{13}\text{C}) = 121$  Hz).  $^{13}\text{C}\{^1\text{H}\}$  NMR (25 °C,  $\text{C}_6\text{D}_6$ , 75.5 MHz):  $\delta = -0.43$  (s,  $(\text{CH}_3)_3\text{Si}-\text{CF}_3\text{SO}_3$ ,  $^1J(^{13}\text{C}-^{29}\text{Si}) = 60.1$  Hz), 119.1 (q,  $(\text{CH}_3)_3\text{Si}-\text{CF}_3\text{SO}_3$ ,  $^1J(^{13}\text{C}-^{19}\text{F}) = 317$  Hz).  $^{29}\text{Si}\{^1\text{H}\}$  NMR (25 °C,  $\text{C}_6\text{D}_6$ , 59.6 MHz):  $\delta = 43.1$ .  $^{19}\text{F}\{^1\text{H}\}$  NMR (25 °C,  $\text{C}_6\text{D}_6$ , 282.4 MHz):  $\delta = -77.6$ .

$^1\text{H}$  NMR (25 °C,  $\text{C}_6\text{D}_6(\text{ext.})$ , 250.13 MHz):  $\delta = 0.81$  (s, 9H,  $\text{Si}(\text{CH}_3)_3$ ,  $^2J(^1\text{H}-^{29}\text{Si}) = 7.2$  Hz,  $^1J(^1\text{H}-^{13}\text{C}) = 121.4$  Hz).  $^{13}\text{C}\{^1\text{H}\}$  NMR (25 °C,  $\text{C}_6\text{D}_6(\text{ext.})$ , 62.9 MHz):  $\delta = -0.43$  (s,  $\text{Si}(\text{CH}_3)_3$ ,  $^1J(^{13}\text{C}-^{29}\text{Si}) = 60.3$  Hz), 119.0 (s,  $\text{CF}_3$ ,  $^1J(^{13}\text{C}-^{19}\text{F}) = 317$  Hz).  $^{29}\text{Si}\{^1\text{H}\}$  NMR (25 °C,  $\text{C}_6\text{D}_6(\text{ext.})$ , 49.7 MHz):  $\delta = 44.0$ .  $^{19}\text{F}\{^1\text{H}\}$  NMR (25 °C,  $\text{C}_6\text{D}_6(\text{ext.})$ , 282.4 MHz):  $\delta = -78.1$ .

Raman (100 mW, 25 °C, 250 scans,  $\text{cm}^{-1}$ ): = 2977 (4), 2912 (10), 1418 (1), 1396 (1), 1248 (2), 1156 (1), 967 (1), 772 (3), 616 (4), 545 (1), 516 (1), 422 (1), 346 (1), 330 (1), 315 (1), 264 (1), 228 (1), 197 (1), 158 (1).

IR (ATR, 16 scans): 2971 (w), 2911 (w), 1387 (s), 1315 (w), 1263 (m), 1246 (m), 1197 (s), 1152 (m), 1099 (w), 960 (s), 832 (s), 767 (s), 707 (w), 670 (w), 620 (s), 570 (s), 543 (s).

## 6. Computational Details

All calculations were carried out with the Gaussian 03 package of molecular orbital programs.<sup>[6]</sup> Structures were optimized within the DFT approach at the pbe1pbe level with an aug-cc-pVDZ.<sup>[7]</sup> Vibrational frequencies were also computed, to include zero-point vibrational energies in thermodynamic parameters and to characterize all structures as minima on the potential energy surface. A natural bond orbital analysis (NBO)<sup>[8]</sup> was performed at the same level, to study the charge distribution, bond polarization and hybridization effects.

## 7. References

- 
- [1] J. B. Lambert, S. Zhang, S. M. Ciro, *Organometallics* **1994**, *13*, 2430; M. Lehmann, A. Schulz, A. Villinger, *Angew. Chem.* **2009**, *121*, 7580.
- [2] M. Driess, R. Barmeyer, C. Monse, K. Merz, *Angew. Chem. Int. Ed.* **2001**, *40*(12), 2308.
- [3] G. M. Sheldrick: SHELXS-97: Program for the Solution of Crystal Structures, University of Göttingen, Germany 1997.
- [4] G. M. Sheldrick: SHELXL-97: Program for the Refinement of Crystal Structures, University of Göttingen, Germany 1997.
- [5] G. M. Sheldrick: SADABS. Version 2. University of Göttingen, Germany 2004.
- [6] Gaussian 03, Revision E.01, M. J. Frisch, G. W. Trucks, H. B. Schlegel, G. E. Scuseria, M. A. Robb, J. R. Cheeseman, J. A. Montgomery, Jr., T. Vreven, K. N. Kudin, J. C. Burant, J. M. Millam, S. S. Iyengar, J. Tomasi, V. Barone, B. Mennucci, M. Cossi, G. Scalmani, N. Rega, G. A. Petersson, H. Nakatsuji, M. Hada, M. Ehara, K. Toyota, R. Fukuda, J. Hasegawa, M. Ishida, T. Nakajima, Y. Honda, O. Kitao, H. Nakai, M. Klene, X. Li, J. E. Knox, H. P. Hratchian, J. B. Cross, V. Bakken, C. Adamo, J. Jaramillo, R. Gomperts, R. E. Stratmann, O. Yazyev, A. J. Austin, R. Cammi, C. Pomelli, J. W. Ochterski, P. Y. Ayala, K. Morokuma, G. A. Voth, P. Salvador, J. J. Dannenberg, V. G. Zakrzewski, S. Dapprich, A. D. Daniels, M. C. Strain, O. Farkas, D. K. Malick, A. D. Rabuck, K. Raghavachari, J. B. Foresman, J. V. Ortiz, Q. Cui, A. G. Baboul, S. Clifford, J. Cioslowski, B. B. Stefanov, G. Liu, A. Liashenko, P. Piskorz, I. Komaromi, R. L. Martin, D. J. Fox, T. Keith, M. A. Al-Laham, C. Y. Peng, A. Nanayakkara, M. Challacombe, P. M. W. Gill, B. Johnson, W. Chen, M. W. Wong, C. Gonzalez, and J. A. Pople, Gaussian, Inc., Wallingford CT, 2004.
- [7] a) T. H. Dunning, Jr. *J. Chem. Phys.* **1989**, *90*, 1007; b) D.E. Woon and T.H. Dunning, Jr. *J. Chem. Phys.* **1993**, *98*, 1358; c) K.A. Peterson and T.H. Dunning, Jr. *J. Chem. Phys.* **2002**, *117*, 10548.

[8] a) Glendening, E. D; Reed, A. E.; Carpenter, J. E.; Weinhold, F. *NBO Version 3.1*; b) Carpenter, J. E.; Weinhold, F. *J. Mol. Struct. (Theochem)* **1988**, *169*, 41; c) Weinhold, F.; Carpenter, J. E. *The Structure of Small Molecules and Ions*, Plenum Press, **1988**, 227; d) Weinhold, F.; Landis, C. *Valency and Bonding. A Natural Bond Orbital Donor-Acceptor Perspective*, Cambridge University Press, **2005** and references therein.
